# Supplementary material for: Characterizing Epitope Binding Regions of Entire Antibody Panels by Combining Experimental and Computational Analysis of Antibody: Antigen Binding Competition
Source: MDPI journal article supplement (doi:10.3390/molecules25163659), 2020-08-11
Supplement: s1 [file s1]

Article

# Characterizing Epitope Binding Regions of Entire Antibody Panels by Combining Experimental and Computational Analysis of Antibody: Antigen Binding Competition

Benjamin D. Brooks <sup>1,2,3,\*</sup>, Adam Closmore <sup>4</sup>, Juechen Yang <sup>5</sup>, Michael Holland <sup>5</sup>, Tina Cairns <sup>3</sup>, Gary H. Cohen <sup>3</sup> and Chris Bailey-Kellogg <sup>6</sup>

<sup>1</sup> Department of Biomedical Sciences, Rocky Vista University, Ivins, UT 84738, USA

<sup>2</sup> Inovon Inc., Fargo, ND 58102, USA

<sup>3</sup> Department of Microbiology, School of Dental Medicine, University of Pennsylvania, Philadelphia, PA 19104, USA; tmcairns@upenn.edu (T.C.); ghc@upenn.edu (G.H.C.)

<sup>4</sup> Department of Pharmacy, North Dakota State University, Fargo, ND 58102, USA; Adam.Closmore@gmail.com

<sup>5</sup> Department of Biomedical Engineering, North Dakota State University, Fargo, ND 58102, USA; juechen.yang@gmail.com (J.Y.); mchollandred@gmail.com (M.H.)

<sup>6</sup> Computer Science Department, Dartmouth College, Hanover, NH 03755, USA; cbk@cs.dartmouth.edu

\* Correspondence: bbrooks@rvu.edu; Tel.: +1-435-222-1403

| Community | gD mAb | Serotype | Neutralizing Activity | Fabs murine/recombinant | Epitope Residues (experimental)  |
|-----------|--------|----------|-----------------------|-------------------------|----------------------------------|
|           | E317   | Common   | Yes                   | Commercial              | 38, 132, 139, 140, 215, 222, 235 |
|           | DL11   | Common   | Yes                   | +/+                     | 38, 132, 140                     |
|           | MC23   | Common   | Yes                   | +/+                     | 213, 216                         |
|           | MC2    | Type-2   | Yes                   | +/+                     | 67, 243-246, 248                 |
|           | MC5    | Common   | Yes                   | +/+                     | 54, 75-77                        |
|           | MC14   | Common   | No                    | +/+                     | 262-272 <sup>*</sup>             |
|           | 1D3    | Common   | Yes                   | +/+                     | 1-29 <sup>*</sup>                |

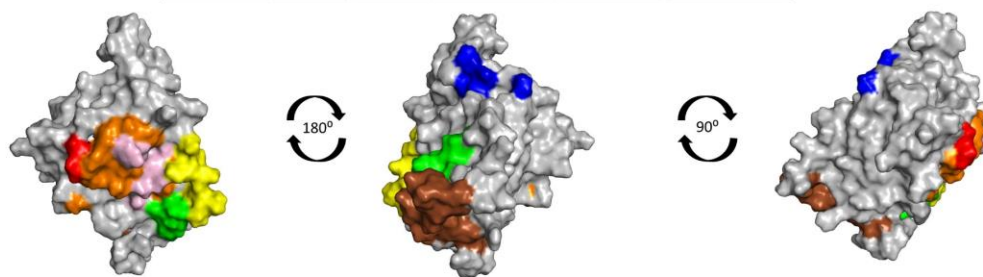

**Figure S1.** Selected Abs and epitope residues with associated experimental data. Communities are colored on the structure of gD. Orange represents nectin binding region. Face #1 is the nectin binding face. Faces #2-4 are rotated by 90, 180, and 270 degrees around the y-axis. Face #5 is the view from above and Face #6 is the view from below.

**Table S1.** Agreement between epitope residues targeted by our control antibody, E317, according to the crystal structure vs. those identified from our dock binning based approach.

| <b>Crystal Structure</b> | <b>Focused Docking</b> |
|--------------------------|------------------------|
| Gln27                    | Gln27                  |
| Tyr38                    | Tyr38                  |
| Gln132                   | Gln132                 |
| Asp139                   | Asp139                 |
| Ser140                   | Ser140                 |
| Asp215                   | Asp215                 |
| Pro221                   | Pro221                 |
| Arg222                   | Arg222                 |
| Phe223                   | Phe223                 |
| Ile224                   |                        |
| Asn227                   |                        |
| Val231                   |                        |
| Ser235                   |                        |
| Ile238                   | Ile238                 |
